# Supplementary material for: Injuries and Persistent Pain in Elite Adolescent Archery Athletes: A Cross-Sectional Epidemiological Study
Source: MDPI journal article supplement (doi:10.3390/sports12040101), 2024-04-02
Supplement: s1 [file s1]

## 1 Personal Athlete Information

Athlete Identification Number: \_\_\_\_\_

Nationality: \_\_\_\_\_

Age: \_\_\_\_\_

Gender: Female ☐ Male ☐

Years of Practicing With Archery: \_\_\_\_\_

Height: \_\_\_\_\_ Weight: \_\_\_\_\_

Hand you write? Right ☐ Left ☐

Hand you pull the cord; Right ☐ Left ☐

## 2 Training/Bow

- How many libres weight the bow you use? \_\_\_\_\_
- What type of bow do you use? Recurve ☐ Compound ☐
- How many days did you train in the most recent (In the last) season? \_\_\_\_\_
- How long (in minutes) did each training session last in the most recent season? \_\_\_\_\_
- On average, how many arrows do you shoot in each practice? \_\_\_\_\_
- How many matches have you competed in this most recent season? \_\_\_\_\_
- On average, how long (in minutes) does each match last? \_\_\_\_\_
- Which of the below are part of your training routine?

|                                        |                              |
|----------------------------------------|------------------------------|
| Upper Body Strength training           | Yes <input type="checkbox"/> |
| Lower Body Strength training           | Yes <input type="checkbox"/> |
| Right arm strength training            | Yes <input type="checkbox"/> |
| Left arm strength training             | Yes <input type="checkbox"/> |
| Aerobic conditioning                   | Yes <input type="checkbox"/> |
| Stretches at the beginning of training | Yes <input type="checkbox"/> |

|                                  |                              |
|----------------------------------|------------------------------|
| Stretches at the end of training | Yes <input type="checkbox"/> |
| Relaxation techniques            | Yes <input type="checkbox"/> |
| Concentration techniques         | Yes <input type="checkbox"/> |
| Breathing exercises              | Yes <input type="checkbox"/> |
| Other                            |                              |

- Do you warm up before each training session? Yes ☐ No ☐
- If so, how many minutes? \_\_\_\_\_
- Do you perform a cooldown after each training session? Yes ☐ No ☐
- If so, how many minutes? \_\_\_\_\_
- During the year, do you undergo physical evaluation (join range of motion, muscular strength)? Yes ☐ No ☐
- Do you have a specific nutritional plan; Yes ☐ No ☐

## 3. Training related pain

- Do you experience any persistent pain for a long period of time that is due to training? Yes ☐ No ☐
- If you have a pain or discomfort during training, do you tell to your coach? Yes ☐ No ☐
- If you have a pain, do you take any medication for it so you can train? Yes ☐ No ☐
- Do you take any medication regularly?  
\_\_\_\_\_
- Does the medication you take help with the pain or discomfort? None ☐ Slight ☐ Some ☐ Much ☐ Very Much ☐
- If you experience any chronic pain during training, fill in the chart below (one chart for each site of pain)

Front

Back

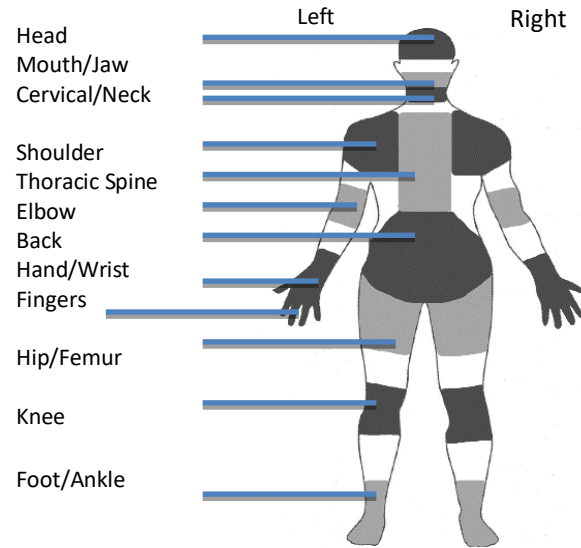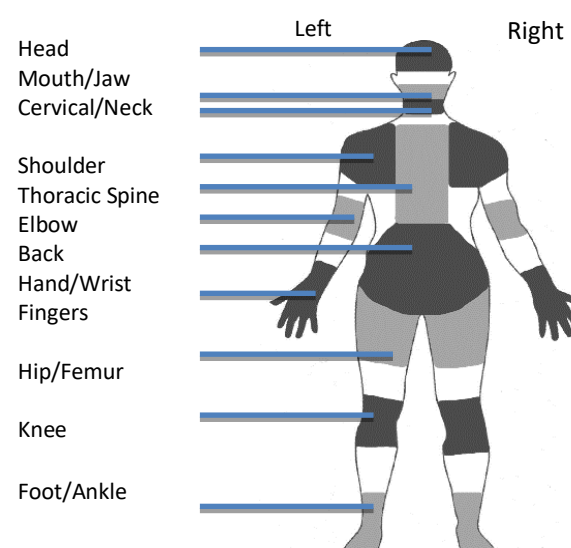

Pain number...

| Did an injury occur?                                     | How long ago did the pain start? (days/month) | Pain duration; (days/months) | Type of pain (Numbness, sharp, burning sensation, dull, pinching, other) | Usual pain intensity; (0= no pain, 10 = extreme pain) | Diagnosis; (ex; tendinitis, back pain, rotator cuff, etc.) | Did you have to stop training;                           | For how long were you unable to train? (days) | Did you have physical therapy?                           | How many sessions? (number) | Was any improvement ?                                                                                                                                                        |
|----------------------------------------------------------|-----------------------------------------------|------------------------------|--------------------------------------------------------------------------|-------------------------------------------------------|------------------------------------------------------------|----------------------------------------------------------|-----------------------------------------------|----------------------------------------------------------|-----------------------------|------------------------------------------------------------------------------------------------------------------------------------------------------------------------------|
| Yes <input type="checkbox"/> No <input type="checkbox"/> |                                               |                              |                                                                          | /10                                                   |                                                            | Yes <input type="checkbox"/> No <input type="checkbox"/> |                                               | Yes <input type="checkbox"/> No <input type="checkbox"/> |                             | None <input type="checkbox"/><br>Slight <input type="checkbox"/><br>Some <input type="checkbox"/><br>A lot of <input type="checkbox"/><br>Very Much <input type="checkbox"/> |

Front

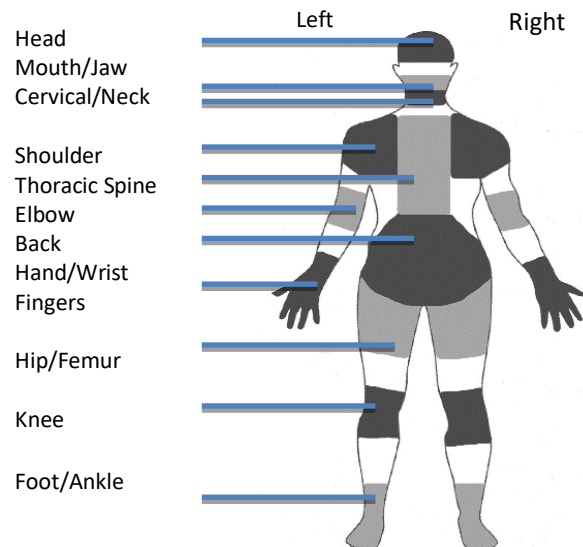

Back

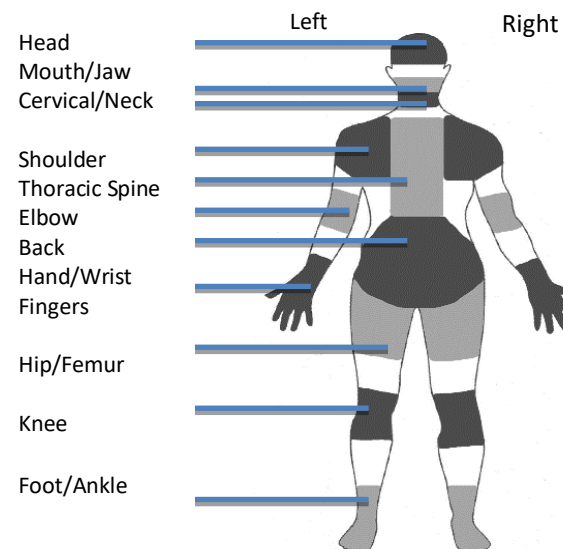

Pain number...

| Did an injury occur?                                     | How long ago did the pain start? (days/month) | Pain duration; (days/months) | Type of pain (Numbness, sharp, burning sensation, dull, pinching, other) | Usual pain intensity; (0= no pain, 10 = extreme pain) | Diagnosis; (ex; tendinitis, back pain, rotator cuff, etc.) | Did you have to stop training;                           | For how long were you unable to train? (days) | Did you have physical therapy?                           | How many sessions? (number) | Was any improvement ?                                                                                                                                                        |
|----------------------------------------------------------|-----------------------------------------------|------------------------------|--------------------------------------------------------------------------|-------------------------------------------------------|------------------------------------------------------------|----------------------------------------------------------|-----------------------------------------------|----------------------------------------------------------|-----------------------------|------------------------------------------------------------------------------------------------------------------------------------------------------------------------------|
| Yes <input type="checkbox"/> No <input type="checkbox"/> |                                               |                              |                                                                          | /10                                                   |                                                            | Yes <input type="checkbox"/> No <input type="checkbox"/> |                                               | Yes <input type="checkbox"/> No <input type="checkbox"/> |                             | None <input type="checkbox"/><br>Slight <input type="checkbox"/><br>Some <input type="checkbox"/><br>A lot of <input type="checkbox"/><br>Very Much <input type="checkbox"/> |

**Front**

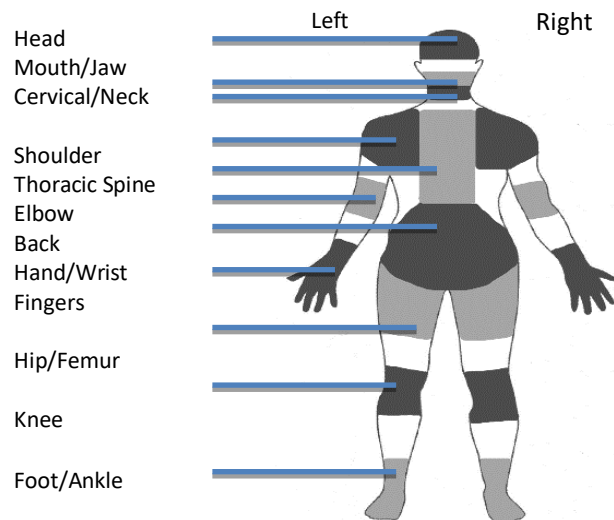

**Back**

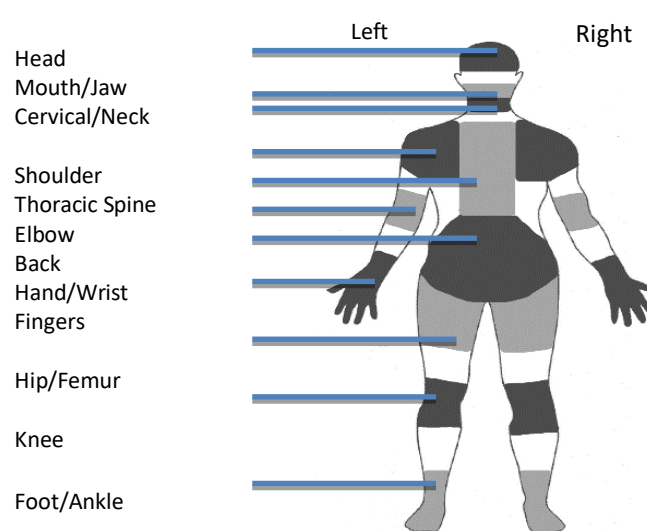

**Pain number...**

| Did an injury occur?                                     | How long ago did the pain start? (days/month) | Pain duration; (days/months) | Type of pain (Numbness, sharp, burning sensation, dull, pinching, other) | Usual pain intensity; (0= no pain, 10 = extreme pain) | Diagnosis; (ex; tendinitis, back pain, rotator cuff, etc.) | Did you have to stop training;                           | For how long were you unable to train? (days) | Did you have physical therapy?                           | How many sessions? (number) | Was any improvement ?                                                                                                                                                        |
|----------------------------------------------------------|-----------------------------------------------|------------------------------|--------------------------------------------------------------------------|-------------------------------------------------------|------------------------------------------------------------|----------------------------------------------------------|-----------------------------------------------|----------------------------------------------------------|-----------------------------|------------------------------------------------------------------------------------------------------------------------------------------------------------------------------|
| Yes <input type="checkbox"/> No <input type="checkbox"/> |                                               |                              |                                                                          | /10                                                   |                                                            | Yes <input type="checkbox"/> No <input type="checkbox"/> |                                               | Yes <input type="checkbox"/> No <input type="checkbox"/> |                             | None <input type="checkbox"/><br>Slight <input type="checkbox"/><br>Some <input type="checkbox"/><br>A lot of <input type="checkbox"/><br>Very Much <input type="checkbox"/> |

7. Please circle the appropriate answer which accurately describes your physical condition **during the last week**

|                                                                                   | No difficulty | Mild difficulty | Moderate difficulty | Severe difficulty | Unable |
|-----------------------------------------------------------------------------------|---------------|-----------------|---------------------|-------------------|--------|
| Did you have any difficulty using your usual technique with your bow?             | 1             | 2               | 3                   | 4                 | 5      |
| Did you have any difficulty training due to any pain?                             | 1             | 2               | 3                   | 4                 | 5      |
| Did you experience any difficulty shooting in training as well as you would like? | 1             | 2               | 3                   | 4                 | 5      |
| Did you have any difficulty spending your usual amount of time training?          | 1             | 2               | 3                   | 4                 | 5      |

#### 4. General Health Status

1. Have you had any medical procedures performed in the past? ( ex, surgery)

---



---

2. Do you have any other general medical conditions? (ex, high blood pressure, diabetes, thyroidism, etc.)

---



---

**This is the last question. Thank you for your cooperation!**
